# Supplementary material for: Systemic Toxicity Reported for CDK8/19 Inhibitors CCT251921 and MSC2530818 Is Not Due to Target Inhibition
Source: MDPI journal article supplement (doi:10.3390/cells8111413), 2019-11-09
Supplement: s1 [file s1]

1 Supplementary Materials

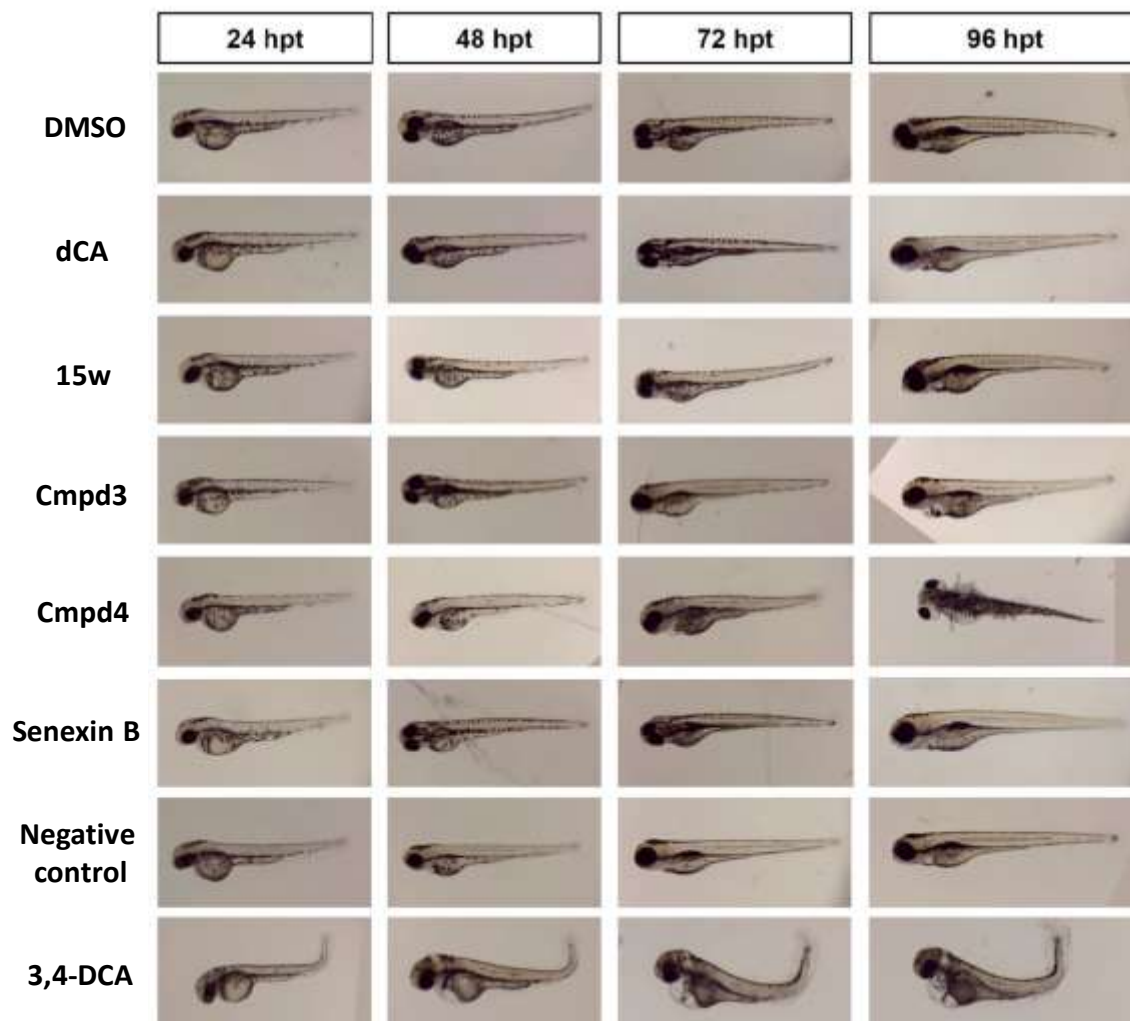

2

3 Supplemental Figure S1. Representative images of compound-treated 24 hpf AB zebrafish embryos.

4

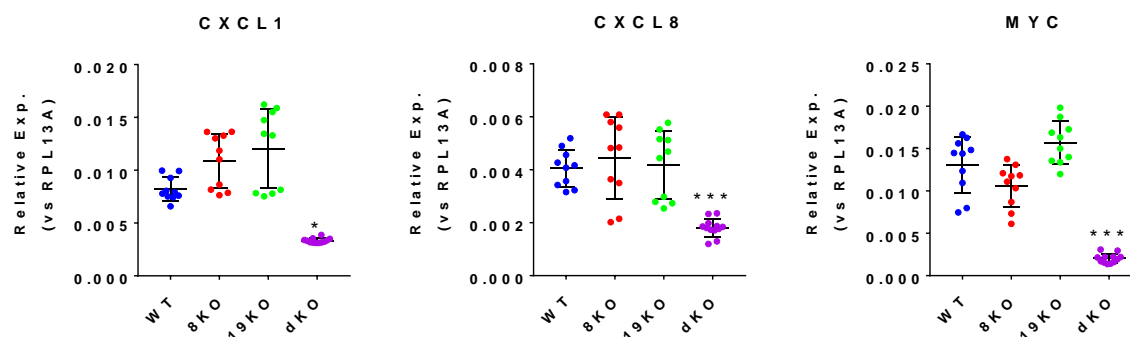

5

6 Supplemental Figure S2. QPCR quantitation of mRNA expression of CDK8/19-dependent genes. 293-  
 7 WT, 8KO, 19KO and dKO cells were treated with vehicle (0.1% DMSO). Statistical significance is  
 8 marked as:  $p < 0.05$  (\*);  $p < 0.01$  (\*\*).

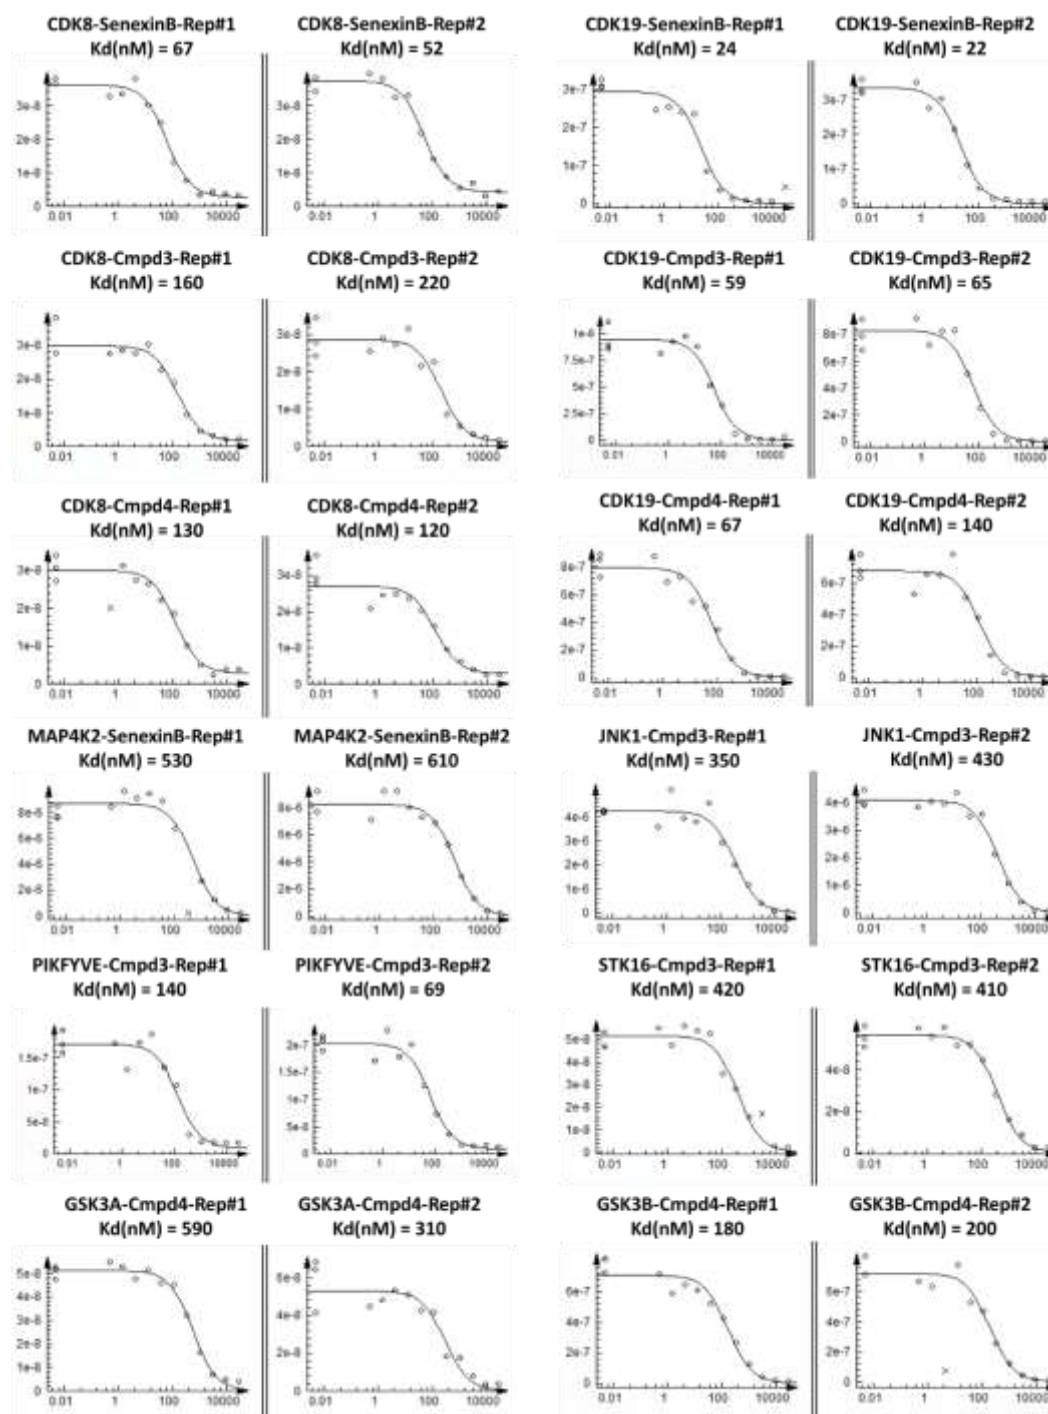

9

10  
11  
12  
13  
14  
15

**Supplemental Figure S3.** Effects of different concentrations of CDK8/19 inhibitors on ATP pocket binding of indicated kinases in KdELECT assays (Discover X). Kinase ATP binding-site competition assays were conducted in duplicates. The amount of kinase target (not competed by tested compounds) measured by QPCR (Signal; y-axis) is plotted against the corresponding compound concentration in nM on log10 scale (x-axis). Data points marked with an "x" were not used for Kd determination.

Supplemental Table S1. QPCR primer sequences

|           |                            |
|-----------|----------------------------|
| RPL13A-F  | GGCCAGCAGTACCTGTTTA        |
| RPL13A-R  | AGATGGCGGAGGTGCAG          |
| GAPDH-F   | CCATCACCATCTTCCAGGAGCG     |
| GAPDH-R   | AGAGATGATGACCCTTTTGCC      |
| CXCL1-F   | GAAAGCTTGCCTCAATCCTG       |
| CXCL1-R   | AACAGCCACCAGTGAGCTTC       |
| CXCL8-F   | TCCTGATTTCTGCAGCTCTGT      |
| CXCL8-R   | AAATTTGGGGTGGAAAGGTT       |
| MYC-F     | CCAACAGGAACTATGACCTCGACTAC |
| MYC-R     | CTCGAATTTCTTCCAGATATCCT    |
| JUN-F     | GGAGACAAGTGGCAGAGTCC       |
| JUN-R     | GTCCTTCTTCTCTTGCGTGG       |
| ADAMTS1-F | GAGGACGAAGGGACTGAGG        |
| ADAMTS1-R | AGCGGTGACTGGACACAAAT       |

16

Supplemental Table S2. Statistics of TU zebrafish embryo bioassay

| Drug          | Day 3   |                             |              |              | Day 4   |                             |              |              | Day 5   |                             |              |              |
|---------------|---------|-----------------------------|--------------|--------------|---------|-----------------------------|--------------|--------------|---------|-----------------------------|--------------|--------------|
|               | p.value | Relative Risk (RR) estimate | 95% CI.lower | 95% CI.upper | p.value | Relative Risk (RR) estimate | 95% CI.lower | 95% CI.upper | p.value | Relative Risk (RR) estimate | 95% CI.lower | 95% CI.upper |
| 2uM Senexin B | 0.483   | 0.00                        | 0.00         | NA           | 0.876   | 1.18                        | 0.15         | 9.17         | 0.236   | 2.06                        | 0.63         | 6.79         |
| 5uM Senexin B | 0.016   | 3.94                        | 1.18         | 13.11        | 0.023   | 2.89                        | 1.11         | 7.52         | 0.016   | 2.44                        | 1.16         | 5.13         |
| 1uM Cmpd#3    | 0.343   | 0.00                        | 0.00         | NA           | 0.007   | 3.86                        | 1.36         | 10.92        | 0.008   | 3.00                        | 1.30         | 6.90         |
| 2uM Cmpd#3    | 0.000   | 9.73                        | 3.41         | 27.64        | 0.000   | 6.10                        | 2.70         | 13.80        | 0.000   | 4.37                        | 2.31         | 8.26         |
| 0.5uM Cmpd#4  | 0.000   | 12.30                       | 4.25         | 35.00        | 0.000   | 11.94                       | 6.48         | 29.98        | 0.000   | 13.15                       | 7.50         | 23.05        |
| 1uM Cmpd#4    | 0.000   | 37.13                       | 13.87        | 99.41        | 0.000   | 27.64                       | 13.33        | 57.30        | 0.000   | 16.13                       | 9.30         | 27.96        |
| 2uM Cmpd#4    | 0.000   | 46.47                       | 17.57        | 122.91       | 0.000   | 38.29                       | 13.66        | 58.55        | 0.000   | 16.50                       | 9.54         | 28.55        |
| 1uM CsA       | 0.080   | 3.45                        | 0.80         | 14.87        | 0.001   | 4.60                        | 1.70         | 12.45        | 0.007   | 3.07                        | 1.34         | 7.05         |
| 2uM CsA       | 0.000   | 8.61                        | 2.87         | 25.81        | 0.000   | 7.38                        | 3.22         | 16.90        | 0.000   | 4.54                        | 2.33         | 8.87         |
| 1uM 15w       | 0.544   | 0.00                        | 0.00         | NA           | 0.665   | 1.57                        | 0.20         | 12.07        | 0.931   | 0.92                        | 0.13         | 6.65         |
| 2uM 15w       | 0.000   | 8.74                        | 2.60         | 29.34        | 0.001   | 4.99                        | 1.79         | 13.95        | 0.001   | 3.88                        | 1.71         | 8.79         |

17

Supplemental Table S3. Effects of 2  $\mu$ M of Senexin B, Cmpd3 and Cmpd4 on the indicated kinases in DiscoverX assay (% control activity)

| DiscoverX Gene Symbol         | Entrez Gene Symbol | 2 $\mu$ M Senexin B | 2 $\mu$ M Cmpd3 | 2 $\mu$ M Cmpd4 |
|-------------------------------|--------------------|---------------------|-----------------|-----------------|
| AAK1                          | AAK1               | 100                 | 87              | 100             |
| ABL1(E255K)-phosphorylated    | ABL1               | 100                 | 62              | 99              |
| ABL1(F317I)-nonphosphorylated | ABL1               | 100                 | 71              | 91              |
| ABL1(F317I)-phosphorylated    | ABL1               | 68                  | 67              | 75              |
| ABL1(F317L)-nonphosphorylated | ABL1               | 98                  | 82              | 100             |
| ABL1(F317L)-phosphorylated    | ABL1               | 90                  | 71              | 63              |
| ABL1(H396P)-nonphosphorylated | ABL1               | 78                  | 98              | 100             |
| ABL1(H396P)-phosphorylated    | ABL1               | 97                  | 53              | 94              |
| ABL1(M351T)-phosphorylated    | ABL1               | 81                  | 83              | 71              |
| ABL1(Q252H)-nonphosphorylated | ABL1               | 82                  | 98              | 100             |
| ABL1(Q252H)-phosphorylated    | ABL1               | 100                 | 58              | 72              |
| ABL1(T315I)-nonphosphorylated | ABL1               | 87                  | 85              | 100             |
| ABL1(T315I)-phosphorylated    | ABL1               | 100                 | 68              | 65              |
| ABL1(Y253F)-phosphorylated    | ABL1               | 100                 | 72              | 87              |
| ABL1-nonphosphorylated        | ABL1               | 89                  | 96              | 94              |
| ABL1-phosphorylated           | ABL1               | 100                 | 84              | 100             |
| ABL2                          | ABL2               | 94                  | 99              | 100             |
| ACVR1                         | ACVR1              | 96                  | 100             | 100             |
| ACVR1B                        | ACVR1B             | 80                  | 15              | 98              |
| ACVR2A                        | ACVR2A             | 71                  | 100             | 47              |
| ACVR2B                        | ACVR2B             | 90                  | 94              | 100             |
| ACVRL1                        | ACVRL1             | 100                 | 100             | 93              |
| ADCK3                         | CABC1              | 100                 | 77              | 100             |
| ADCK4                         | ADCK4              | 65                  | 100             | 94              |
| AKT1                          | AKT1               | 100                 | 96              | 95              |

|             |        |     |     |     |
|-------------|--------|-----|-----|-----|
| AKT2        | AKT2   | 100 | 89  | 90  |
| AKT3        | AKT3   | 93  | 100 | 100 |
| ALK         | ALK    | 100 | 32  | 97  |
| ALK(C1156Y) | ALK    | NA  | 58  | 100 |
| ALK(L1196M) | ALK    | NA  | 92  | 94  |
| AMPK-alpha1 | PRKAA1 | 100 | 100 | 93  |
| AMPK-alpha2 | PRKAA2 | 100 | 89  | 81  |
| ANKK1       | ANKK1  | 87  | 78  | 86  |
| ARK5        | NUAK1  | 100 | 90  | 80  |
| ASK1        | MAP3K5 | 100 | 100 | 99  |
| ASK2        | MAP3K6 | 89  | 75  | 71  |
| AURKA       | AURKA  | 100 | 78  | 83  |
| AURKB       | AURKB  | 82  | 72  | 72  |
| AURKC       | AURKC  | 80  | 100 | 95  |
| AXL         | AXL    | 99  | 75  | 96  |
| BIKE        | BMP2K  | 92  | 74  | 98  |
| BLK         | BLK    | 100 | 100 | 100 |
| BMPR1A      | BMPR1A | 72  | 13  | 100 |
| BMPR1B      | BMPR1B | 84  | 85  | 82  |
| BMPR2       | BMPR2  | 93  | 69  | 78  |
| BMX         | BMX    | 100 | 68  | 94  |
| BRAF        | BRAF   | 100 | 73  | 82  |
| BRAF(V600E) | BRAF   | 100 | 63  | 89  |
| BRK         | PTK6   | 100 | 100 | 100 |
| BRSK1       | BRSK1  | 87  | 100 | 98  |
| BRSK2       | BRSK2  | 100 | 91  | 100 |
| BTK         | BTK    | 100 | 68  | 93  |
| BUB1        | BUB1   | 100 | 46  | 76  |
| CAMK1       | CAMK1  | 96  | 72  | 81  |

|               |        |     |     |     |
|---------------|--------|-----|-----|-----|
| CAMK1B        | PNCK   | NA  | 92  | 98  |
| CAMK1D        | CAMK1D | 100 | 97  | 96  |
| CAMK1G        | CAMK1G | 100 | 73  | 96  |
| CAMK2A        | CAMK2A | 80  | 93  | 92  |
| CAMK2B        | CAMK2B | 100 | 87  | 91  |
| CAMK2D        | CAMK2D | 100 | 81  | 73  |
| CAMK2G        | CAMK2G | 100 | 81  | 100 |
| CAMK4         | CAMK4  | 100 | 100 | 100 |
| CAMKK1        | CAMKK1 | 100 | 86  | 97  |
| CAMKK2        | CAMKK2 | 100 | 82  | 100 |
| CASK          | CASK   | 99  | 73  | 71  |
| CDC2L1        | CDK11B | 100 | 98  | 100 |
| CDC2L2        | CDC2L2 | 100 | 97  | 100 |
| CDC2L5        | CDK13  | 100 | 64  | 56  |
| CDK11         | CDK19  | 1.4 | 1.8 | 4.4 |
| CDK2          | CDK2   | 92  | 92  | 96  |
| CDK3          | CDK3   | 100 | 96  | 100 |
| CDK4          | CDK4   | NA  | 67  | 57  |
| CDK4-cyclinD1 | CDK4   | 100 | 90  | 92  |
| CDK4-cyclinD3 | CDK4   | 100 | 66  | 79  |
| CDK5          | CDK5   | 100 | 100 | 98  |
| CDK7          | CDK7   | 92  | 84  | 92  |
| CDK8          | CDK8   | 2.2 | 23  | 33  |
| CDK9          | CDK9   | 100 | 99  | 100 |
| CDKL1         | CDKL1  | 100 | 82  | 86  |
| CDKL2         | CDKL2  | 50  | 98  | 100 |
| CDKL3         | CDKL3  | 77  | 95  | 100 |
| CDKL5         | CDKL5  | 100 | 70  | 94  |
| CHEK1         | CHEK1  | 100 | 88  | 100 |

|                             |          |     |     |     |
|-----------------------------|----------|-----|-----|-----|
| CHEK2                       | CHEK2    | 100 | 90  | 95  |
| CIT                         | CIT      | 70  | 84  | 100 |
| CLK1                        | CLK1     | 65  | 93  | 65  |
| CLK2                        | CLK2     | 80  | 88  | 33  |
| CLK3                        | CLK3     | 92  | 65  | 62  |
| CLK4                        | CLK4     | 41  | 89  | 69  |
| CSF1R                       | CSF1R    | 94  | 63  | 100 |
| CSF1R- <i>autoinhibited</i> | CSF1R    | 84  | 34  | 69  |
| CSK                         | CSK      | 100 | 59  | 86  |
| CSNK1A1                     | CSNK1A1  | 73  | 100 | 100 |
| CSNK1A1L                    | CSNK1A1L | 90  | 85  | 96  |
| CSNK1D                      | CSNK1D   | 67  | 83  | 85  |
| CSNK1E                      | CSNK1E   | 95  | 87  | 78  |
| CSNK1G1                     | CSNK1G1  | 70  | 98  | 91  |
| CSNK1G2                     | CSNK1G2  | 75  | 98  | 98  |
| CSNK1G3                     | CSNK1G3  | 81  | 94  | 98  |
| CSNK2A1                     | CSNK2A1  | 100 | 91  | 69  |
| CSNK2A2                     | CSNK2A2  | 100 | 89  | 96  |
| CTK                         | MATK     | 98  | 100 | 100 |
| DAPK1                       | DAPK1    | 86  | 98  | 100 |
| DAPK2                       | DAPK2    | 87  | 93  | 93  |
| DAPK3                       | DAPK3    | 68  | 95  | 100 |
| DCAMKL1                     | DCLK1    | 90  | 43  | 70  |
| DCAMKL2                     | DCLK2    | 100 | 100 | 100 |
| DCAMKL3                     | DCLK3    | 86  | 100 | 47  |
| DDR1                        | DDR1     | 100 | 78  | 100 |
| DDR2                        | DDR2     | 94  | 78  | 79  |
| DLK                         | MAP3K12  | 100 | 61  | 81  |
| DMPK                        | DMPK     | 99  | 94  | 98  |

|                           |          |     |     |     |
|---------------------------|----------|-----|-----|-----|
| DMPK2                     | CDC42BPG | 100 | 100 | 93  |
| DRAK1                     | STK17A   | 86  | 100 | 100 |
| DRAK2                     | STK17B   | 100 | 96  | 100 |
| DYRK1A                    | DYRK1A   | 100 | 63  | 81  |
| DYRK1B                    | DYRK1B   | 67  | 88  | 79  |
| DYRK2                     | DYRK2    | 77  | 80  | 90  |
| EGFR                      | EGFR     | 100 | 89  | 100 |
| EGFR(E746-A750del)        | EGFR     | 100 | 80  | 84  |
| EGFR(G719C)               | EGFR     | 100 | 76  | 68  |
| EGFR(G719S)               | EGFR     | 100 | 82  | 66  |
| EGFR(L747-E749del, A750P) | EGFR     | 99  | 85  | 100 |
| EGFR(L747-S752del, P753S) | EGFR     | 100 | 95  | 92  |
| EGFR(L747-T751del, Sins)  | EGFR     | 81  | 72  | 71  |
| EGFR(L858R)               | EGFR     | 100 | 79  | 100 |
| EGFR(L858R, T790M)        | EGFR     | 100 | 81  | 51  |
| EGFR(L861Q)               | EGFR     | 78  | 78  | 73  |
| EGFR(S752-I759del)        | EGFR     | 72  | 77  | 51  |
| EGFR(T790M)               | EGFR     | 91  | 82  | 70  |
| EIF2AK1                   | EIF2AK1  | 100 | 73  | 90  |
| EPHA1                     | EPHA1    | 93  | 93  | 100 |
| EPHA2                     | EPHA2    | 83  | 80  | 89  |
| EPHA3                     | EPHA3    | 80  | 98  | 100 |
| EPHA4                     | EPHA4    | 99  | 99  | 90  |
| EPHA5                     | EPHA5    | 100 | 98  | 100 |
| EPHA6                     | EPHA6    | 97  | 100 | 97  |
| EPHA7                     | EPHA7    | 100 | 95  | 100 |
| EPHA8                     | EPHA8    | 100 | 98  | 100 |
| EPHB1                     | EPHB1    | 91  | 100 | 93  |
| EPHB2                     | EPHB2    | 89  | 94  | 88  |



|                 |        |     |     |     |
|-----------------|--------|-----|-----|-----|
| EPHB3           | EPHB3  | 100 | 100 | 100 |
| EPHB4           | EPHB4  | 96  | 91  | 97  |
| EPHB6           | EPHB6  | 84  | 84  | 87  |
| ERBB2           | ERBB2  | 83  | 70  | 64  |
| ERBB3           | ERBB3  | 87  | 95  | 90  |
| ERBB4           | ERBB4  | 98  | 99  | 100 |
| ERK1            | MAPK3  | 94  | 100 | 100 |
| ERK2            | MAPK1  | 100 | 97  | 100 |
| ERK3            | MAPK6  | 100 | 100 | 100 |
| ERK4            | MAPK4  | 100 | 100 | 100 |
| ERK5            | MAPK7  | 100 | 100 | 100 |
| ERK8            | MAPK15 | 100 | 96  | 45  |
| ERN1            | ERN1   | 100 | 32  | 59  |
| FAK             | PTK2   | 93  | 100 | 97  |
| FER             | FER    | 100 | 100 | 100 |
| FES             | FES    | 100 | 96  | 100 |
| FGFR1           | FGFR1  | 88  | 100 | 98  |
| FGFR2           | FGFR2  | 100 | 91  | 97  |
| FGFR3           | FGFR3  | 100 | 72  | 99  |
| FGFR3(G697C)    | FGFR3  | 73  | 95  | 100 |
| FGFR4           | FGFR4  | 100 | 100 | 100 |
| FGR             | FGR    | 95  | 91  | 87  |
| FLT1            | FLT1   | 80  | 100 | 98  |
| FLT3            | FLT3   | 100 | 75  | 100 |
| FLT3(D835H)     | FLT3   | 100 | 83  | 100 |
| FLT3(D835V)     | FLT3   | NA  | 37  | 50  |
| FLT3(D835Y)     | FLT3   | 85  | 98  | 100 |
| FLT3(ITD)       | FLT3   | 54  | 100 | 97  |
| FLT3(ITD,D835V) | FLT3   | NA  | 59  | 70  |

|                       |         |     |     |     |
|-----------------------|---------|-----|-----|-----|
| FLT3(ITD,F691L)       | FLT3    | NA  | 40  | 54  |
| FLT3(K663Q)           | FLT3    | 100 | 78  | 100 |
| FLT3(N841I)           | FLT3    | 63  | 88  | 100 |
| FLT3(R834Q)           | FLT3    | 100 | 59  | 66  |
| FLT3-autoinhibited    | FLT3    | 100 | 69  | 75  |
| FLT4                  | FLT4    | 100 | 98  | 100 |
| FRK                   | FRK     | 100 | 100 | 100 |
| FYN                   | FYN     | 100 | 100 | 100 |
| GAK                   | GAK     | 85  | 74  | 100 |
| GCN2(Kin.Dom.2,S808G) | EIF2AK4 | 100 | 100 | 62  |
| GRK1                  | GRK1    | 64  | 82  | 90  |
| GRK2                  | ADRBK1  | NA  | 91  | 99  |
| GRK3                  | ADRBK2  | NA  | 96  | 100 |
| GRK4                  | GRK4    | 100 | 52  | 94  |
| GRK7                  | GRK7    | 80  | 87  | 96  |
| GSK3A                 | GSK3A   | 97  | 97  | 17  |
| GSK3B                 | GSK3B   | 85  | 69  | 43  |
| HASPIN                | GSG2    | 36  | 66  | 70  |
| HCK                   | HCK     | 85  | 100 | 100 |
| HIPK1                 | HIPK1   | 75  | 94  | 100 |
| HIPK2                 | HIPK2   | 72  | 72  | 75  |
| HIPK3                 | HIPK3   | 55  | 84  | 84  |
| HIPK4                 | HIPK4   | 73  | 100 | 99  |
| HPK1                  | MAP4K1  | 100 | 93  | 86  |
| HUNK                  | HUNK    | 72  | 100 | 100 |
| ICK                   | ICK     | 93  | 73  | 67  |
| IGF1R                 | IGF1R   | 100 | 96  | 100 |
| IKK-alpha             | CHUK    | 100 | 76  | 73  |
| IKK-beta              | IKKBK   | 100 | 66  | 70  |

|                              |        |     |     |     |
|------------------------------|--------|-----|-----|-----|
| IKK-epsilon                  | IKBKE  | 80  | 81  | 90  |
| INSR                         | INSR   | 98  | 83  | 81  |
| INSRR                        | INSRR  | 100 | 91  | 99  |
| IRAK1                        | IRAK1  | 67  | 67  | 89  |
| IRAK3                        | IRAK3  | 83  | 90  | 86  |
| IRAK4                        | IRAK4  | 100 | 75  | 79  |
| ITK                          | ITK    | 100 | 100 | 100 |
| JAK1(JH1domain-catalytic)    | JAK1   | 100 | 90  | 48  |
| JAK1(JH2domain-pseudokinase) | JAK1   | 89  | 42  | 80  |
| JAK2(JH1domain-catalytic)    | JAK2   | 85  | 68  | 49  |
| JAK3(JH1domain-catalytic)    | JAK3   | 71  | 63  | 55  |
| JNK1                         | MAPK8  | 99  | 23  | 70  |
| JNK2                         | MAPK9  | 100 | 66  | 83  |
| JNK3                         | MAPK10 | 100 | 48  | 68  |
| KIT                          | KIT    | 82  | 100 | 100 |
| KIT(A829P)                   | KIT    | 73  | 79  | 91  |
| KIT(D816H)                   | KIT    | 79  | 56  | 47  |
| KIT(D816V)                   | KIT    | 100 | 88  | 95  |
| KIT(L576P)                   | KIT    | 86  | 99  | 99  |
| KIT(V559D)                   | KIT    | 70  | 97  | 100 |
| KIT(V559D,I670I)             | KIT    | 79  | 76  | 100 |
| KIT(V559D,V654A)             | KIT    | 100 | 100 | 100 |
| KIT-autoinhibited            | KIT    | 100 | 75  | 79  |
| LATS1                        | LATS1  | 100 | 100 | 53  |
| LATS2                        | LATS2  | 78  | 70  | 61  |
| LCK                          | LCK    | 90  | 100 | 100 |
| LIMK1                        | LIMK1  | 99  | 100 | 98  |
| LIMK2                        | LIMK2  | 100 | 100 | 89  |
| LKB1                         | STK11  | 100 | 100 | 100 |

|               |          |     |     |     |
|---------------|----------|-----|-----|-----|
| LOK           | STK10    | 100 | 100 | 100 |
| LRRK2         | LRRK2    | 99  | 59  | 67  |
| LRRK2(G2019S) | LRRK2    | 70  | 58  | 63  |
| LTK           | LTK      | 92  | 62  | 99  |
| LYN           | LYN      | 80  | 97  | 85  |
| LZK           | MAP3K13  | 100 | 93  | 91  |
| MAK           | MAK      | 99  | 100 | 100 |
| MAP3K1        | MAP3K1   | 94  | 74  | 75  |
| MAP3K15       | MAP3K15  | 90  | 99  | 51  |
| MAP3K2        | MAP3K2   | 100 | 68  | 74  |
| MAP3K3        | MAP3K3   | 97  | 97  | 95  |
| MAP3K4        | MAP3K4   | 74  | 100 | 100 |
| MAP4K2        | MAP4K2   | 31  | 64  | 74  |
| MAP4K3        | MAP4K3   | 97  | 100 | 100 |
| MAP4K4        | MAP4K4   | 91  | 100 | 70  |
| MAP4K5        | MAP4K5   | 97  | 100 | 51  |
| MAPKAPK2      | MAPKAPK2 | 100 | 86  | 100 |
| MAPKAPK5      | MAPKAPK5 | 100 | 67  | 72  |
| MARK1         | MARK1    | 82  | 99  | 100 |
| MARK2         | MARK2    | 82  | 97  | 100 |
| MARK3         | MARK3    | 90  | 100 | 100 |
| MARK4         | MARK4    | 100 | 100 | 100 |
| MAST1         | MAST1    | 100 | 97  | 98  |
| MEK1          | MAP2K1   | 92  | 79  | 72  |
| MEK2          | MAP2K2   | 96  | 78  | 76  |
| MEK3          | MAP2K3   | 74  | 57  | 69  |
| MEK4          | MAP2K4   | 100 | 54  | 86  |
| MEK5          | MAP2K5   | 100 | 81  | 70  |
| MEK6          | MAP2K6   | 100 | 83  | 93  |

|             |          |     |     |     |
|-------------|----------|-----|-----|-----|
| MELK        | MELK     | 94  | 86  | 100 |
| MERTK       | MERTK    | 100 | 88  | 91  |
| MET         | MET      | 92  | 92  | 99  |
| MET(M1250T) | MET      | 100 | 99  | 100 |
| MET(Y1235D) | MET      | 93  | 72  | 68  |
| MINK        | MINK1    | 96  | 75  | 83  |
| MKK7        | MAP2K7   | 100 | 78  | 67  |
| MKNK1       | MKNK1    | 66  | 67  | 70  |
| MKNK2       | MKNK2    | 95  | 76  | 79  |
| MLCK        | MYLK3    | 89  | 100 | 98  |
| MLK1        | MAP3K9   | 100 | 95  | 100 |
| MLK2        | MAP3K10  | 92  | 99  | 89  |
| MLK3        | MAP3K11  | 96  | 97  | 95  |
| MRCKA       | CDC42BPA | 90  | 100 | 99  |
| MRCKB       | CDC42BPB | 96  | 90  | 100 |
| MST1        | STK4     | 100 | 100 | 100 |
| MST1R       | MST1R    | 100 | 99  | 91  |
| MST2        | STK3     | 83  | 99  | 96  |
| MST3        | STK24    | 100 | 93  | 100 |
| MST4        | MST4     | 100 | 84  | 68  |
| MTOR        | MTOR     | 76  | 87  | 94  |
| MUSK        | MUSK     | 100 | 55  | 100 |
| MYLK        | MYLK     | 83  | 94  | 100 |
| MYLK2       | MYLK2    | 99  | 87  | 92  |
| MYLK4       | MYLK4    | 79  | 79  | 94  |
| MYO3A       | MYO3A    | 100 | 100 | 100 |
| MYO3B       | MYO3B    | 100 | 100 | 100 |
| NDR1        | STK38    | 100 | 73  | 78  |
| NDR2        | STK38L   | 100 | 100 | 100 |

|           |          |     |     |     |
|-----------|----------|-----|-----|-----|
| NEK1      | NEK1     | 97  | 71  | 73  |
| NEK10     | NEK10    | NA  | 53  | 63  |
| NEK11     | NEK11    | 88  | 68  | 62  |
| NEK2      | NEK2     | 92  | 97  | 96  |
| NEK3      | NEK3     | 96  | 79  | 81  |
| NEK4      | NEK4     | 91  | 80  | 78  |
| NEK5      | NEK5     | 100 | 100 | 100 |
| NEK6      | NEK6     | 93  | 97  | 95  |
| NEK7      | NEK7     | 100 | 100 | 93  |
| NEK9      | NEK9     | 100 | 98  | 100 |
| NIK       | MAP3K14  | NA  | 64  | 42  |
| NIM1      | MGC42105 | 100 | 70  | 75  |
| NLK       | NLK      | 100 | 96  | 100 |
| OSR1      | OXSRI    | 100 | 77  | 99  |
| p38-alpha | MAPK14   | 100 | 95  | 97  |
| p38-beta  | MAPK11   | 77  | 71  | 95  |
| p38-delta | MAPK13   | 100 | 88  | 100 |
| p38-gamma | MAPK12   | 100 | 85  | 99  |
| PAK1      | PAK1     | 100 | 80  | 51  |
| PAK2      | PAK2     | 100 | 79  | 68  |
| PAK3      | PAK3     | 100 | 100 | 100 |
| PAK4      | PAK4     | 100 | 95  | 100 |
| PAK6      | PAK6     | 100 | 56  | 100 |
| PAK7      | PAK7     | 100 | 100 | 100 |
| PCTK1     | CDK16    | 100 | 73  | 78  |
| PCTK2     | CDK17    | 100 | 100 | 100 |
| PCTK3     | CDK18    | 100 | 95  | 100 |
| PDGFRA    | PDGFRA   | 100 | 67  | 75  |
| PDGFRB    | PDGFRB   | 94  | 100 | 100 |

|                       |             |     |     |     |
|-----------------------|-------------|-----|-----|-----|
| PDPK1                 | PDPK1       | 100 | 100 | 92  |
| PFCDPK1(P.falciparum) | CDPK1       | 100 | 68  | 68  |
| PFPK5(P.falciparum)   | MAL13P1.279 | 100 | 100 | 100 |
| PFTAIRE2              | CDK15       | 100 | 100 | 100 |
| PFTK1                 | CDK14       | 100 | 100 | 99  |
| PHKG1                 | PHKG1       | 95  | 100 | 93  |
| PHKG2                 | PHKG2       | 100 | 100 | 100 |
| PIK3C2B               | PIK3C2B     | 92  | 57  | 86  |
| PIK3C2G               | PIK3C2G     | 100 | 31  | 81  |
| PIK3CA                | PIK3CA      | 93  | 82  | 94  |
| PIK3CA(C420R)         | PIK3CA      | 62  | 87  | 85  |
| PIK3CA(E542K)         | PIK3CA      | 77  | 85  | 58  |
| PIK3CA(E545A)         | PIK3CA      | 90  | 90  | 86  |
| PIK3CA(E545K)         | PIK3CA      | 61  | 89  | 67  |
| PIK3CA(H1047L)        | PIK3CA      | 94  | 90  | 95  |
| PIK3CA(H1047Y)        | PIK3CA      | 72  | 100 | 84  |
| PIK3CA(I800L)         | PIK3CA      | 95  | 77  | 46  |
| PIK3CA(M1043I)        | PIK3CA      | 80  | 71  | 76  |
| PIK3CA(Q546K)         | PIK3CA      | 100 | 78  | 78  |
| PIK3CB                | PIK3CB      | 89  | 100 | 100 |
| PIK3CD                | PIK3CD      | 73  | 65  | 88  |
| PIK3CG                | PIK3CG      | 59  | 65  | 94  |
| PIK4CB                | PI4KB       | 100 | 23  | 77  |
| PIKFYVE               | PIKFYVE     | NA  | 0   | 80  |
| PIM1                  | PIM1        | 100 | 86  | 100 |
| PIM2                  | PIM2        | 100 | 100 | 100 |
| PIM3                  | PIM3        | 100 | 87  | 75  |
| PIP5K1A               | PIP5K1A     | 100 | 87  | 75  |
| PIP5K1C               | PIP5K1C     | 81  | 77  | 95  |

|                      |          |     |     |     |
|----------------------|----------|-----|-----|-----|
| PIP5K2B              | PIP4K2B  | 97  | 89  | 60  |
| PIP5K2C              | PIP4K2C  | 54  | 86  | 100 |
| PKAC-alpha           | PRKACA   | 100 | 100 | 91  |
| PKAC-beta            | PRKACB   | 86  | 100 | 91  |
| PKMYT1               | PKMYT1   | 84  | 92  | 100 |
| PKN1                 | PKN1     | 100 | 100 | 94  |
| PKN2                 | PKN2     | 78  | 98  | 99  |
| PKNB(M.tuberculosis) | pknB     | 99  | 85  | 72  |
| PLK1                 | PLK1     | 93  | 72  | 70  |
| PLK2                 | PLK2     | 100 | 85  | 85  |
| PLK3                 | PLK3     | 100 | 81  | 75  |
| PLK4                 | PLK4     | 100 | 92  | 89  |
| PRKCD                | PRKCD    | 92  | 96  | 97  |
| PRKCE                | PRKCE    | 65  | 43  | 61  |
| PRKCH                | PRKCH    | 100 | 92  | 85  |
| PRKCI                | PRKCI    | 100 | 87  | 65  |
| PRKCQ                | PRKCQ    | 100 | 85  | 83  |
| PRKD1                | PRKD1    | 58  | 100 | 88  |
| PRKD2                | PRKD2    | 75  | 96  | 94  |
| PRKD3                | PRKD3    | 100 | 92  | 100 |
| PRKG1                | PRKG1    | 77  | 100 | 100 |
| PRKG2                | PRKG2    | 100 | 80  | 86  |
| PRKR                 | EIF2AK2  | 88  | 99  | 67  |
| PRKX                 | PRKX     | 100 | 92  | 73  |
| PRP4                 | PRPF4B   | 96  | 100 | 100 |
| PYK2                 | PTK2B    | 100 | 84  | 96  |
| QSK                  | KIAA0999 | 100 | 73  | 61  |
| RAF1                 | RAF1     | 93  | 99  | 100 |
| RET                  | RET      | 100 | 13  | 100 |



|                               |         |     |     |     |
|-------------------------------|---------|-----|-----|-----|
| RET(M918T)                    | RET     | 100 | 100 | 100 |
| RET(V804L)                    | RET     | 94  | 99  | 95  |
| RET(V804M)                    | RET     | 100 | 100 | 100 |
| RIOK1                         | RIOK1   | 95  | 100 | 100 |
| RIOK2                         | RIOK2   | 84  | 75  | 77  |
| RIOK3                         | RIOK3   | 100 | 97  | 100 |
| RIPK1                         | RIPK1   | 100 | 100 | 100 |
| RIPK2                         | RIPK2   | 84  | 100 | 98  |
| RIPK4                         | RIPK4   | 100 | 69  | 83  |
| RIPK5                         | DSTYK   | 100 | 42  | 79  |
| ROCK1                         | ROCK1   | 100 | 82  | 62  |
| ROCK2                         | ROCK2   | 100 | 71  | 73  |
| ROS1                          | ROS1    | 98  | 93  | 100 |
| RPS6KA4(Kin.Dom.1-N-terminal) | RPS6KA4 | 99  | 100 | 98  |
| RPS6KA4(Kin.Dom.2-C-terminal) | RPS6KA4 | 100 | 79  | 79  |
| RPS6KA5(Kin.Dom.1-N-terminal) | RPS6KA5 | 100 | 89  | 93  |
| RPS6KA5(Kin.Dom.2-C-terminal) | RPS6KA5 | 100 | 100 | 100 |
| RSK1(Kin.Dom.1-N-terminal)    | RPS6KA1 | 99  | 80  | 100 |
| RSK1(Kin.Dom.2-C-terminal)    | RPS6KA1 | 100 | 98  | 100 |
| RSK2(Kin.Dom.1-N-terminal)    | RPS6KA3 | 100 | 67  | 77  |
| RSK2(Kin.Dom.2-C-terminal)    | RPS6KA3 | 100 | 78  | 92  |
| RSK3(Kin.Dom.1-N-terminal)    | RPS6KA2 | 100 | 86  | 93  |
| RSK3(Kin.Dom.2-C-terminal)    | RPS6KA2 | 96  | 92  | 96  |
| RSK4(Kin.Dom.1-N-terminal)    | RPS6KA6 | 100 | 74  | 81  |
| RSK4(Kin.Dom.2-C-terminal)    | RPS6KA6 | 100 | 85  | 100 |
| S6K1                          | RPS6KB1 | 100 | 69  | 67  |
| SBK1                          | SBK1    | 100 | 74  | 90  |
| SGK                           | SGK1    | 83  | 59  | 62  |
| SgK110                        | SgK110  | 100 | 100 | 100 |

|        |        |     |     |     |
|--------|--------|-----|-----|-----|
| SGK2   | SGK2   | NA  | 71  | 67  |
| SGK3   | SGK3   | 81  | 60  | 79  |
| SIK    | SIK1   | 100 | 96  | 98  |
| SIK2   | SIK2   | 74  | 100 | 100 |
| SLK    | SLK    | 100 | 98  | 98  |
| SNARK  | NUAK2  | 100 | 61  | 82  |
| SNRK   | SNRK   | 100 | 85  | 90  |
| SRC    | SRC    | 100 | 100 | 99  |
| SRM5   | SRM5   | 100 | 78  | 77  |
| SRPK1  | SRPK1  | 100 | 79  | 100 |
| SRPK2  | SRPK2  | 100 | 98  | 100 |
| SRPK3  | SRPK3  | 100 | 42  | 85  |
| STK16  | STK16  | 60  | 14  | 94  |
| STK33  | STK33  | 100 | 100 | 100 |
| STK35  | STK35  | 100 | 100 | 100 |
| STK36  | STK36  | 95  | 95  | 85  |
| STK39  | STK39  | 100 | 78  | 66  |
| SYK    | SYK    | 81  | 100 | 100 |
| TAK1   | MAP3K7 | 72  | 74  | 88  |
| TAOK1  | TAOK1  | 96  | 69  | 65  |
| TAOK2  | TAOK2  | 89  | 73  | 80  |
| TAOK3  | TAOK3  | 100 | 68  | 75  |
| TBK1   | TBK1   | 100 | 85  | 93  |
| TEC    | TEC    | 100 | 94  | 100 |
| TESK1  | TESK1  | 83  | 100 | 85  |
| TGFBR1 | TGFBR1 | 85  | 91  | 100 |
| TGFBR2 | TGFBR2 | 100 | 100 | 100 |
| TIE1   | TIE1   | 100 | 88  | 100 |
| TIE2   | TEK    | 84  | 63  | 73  |

|                              |        |     |     |     |
|------------------------------|--------|-----|-----|-----|
| TLK1                         | TLK1   | 100 | 94  | 100 |
| TLK2                         | TLK2   | 100 | 98  | 66  |
| TNIK                         | TNIK   | 100 | 95  | 100 |
| TNK1                         | TNK1   | 100 | 87  | 100 |
| TNK2                         | TNK2   | 100 | 84  | 100 |
| TNNIBK                       | TNNIBK | 100 | 100 | 100 |
| TRKA                         | NTRK1  | 94  | 66  | 76  |
| TRKB                         | NTRK2  | 100 | 70  | 84  |
| TRKC                         | NTRK3  | 99  | 73  | 86  |
| TRPM6                        | TRPM6  | 66  | 72  | 78  |
| TSSK1B                       | TSSK1B | 92  | 83  | 100 |
| TSSK3                        | TSSK3  | NA  | 100 | 100 |
| TTK                          | TTK    | 73  | 44  | 91  |
| TXK                          | TXK    | 98  | 96  | 85  |
| TYK2(JH1domain-catalytic)    | TYK2   | 73  | 59  | 58  |
| TYK2(JH2domain-pseudokinase) | TYK2   | 90  | 66  | 65  |
| TYRO3                        | TYRO3  | 100 | 100 | 93  |
| ULK1                         | ULK1   | 79  | 71  | 83  |
| ULK2                         | ULK2   | 92  | 72  | 71  |
| ULK3                         | ULK3   | 84  | 65  | 76  |
| VEGFR2                       | KDR    | 100 | 69  | 80  |
| VPS34                        | PIK3C3 | NA  | 56  | 68  |
| VRK2                         | VRK2   | 100 | 61  | 47  |
| WEE1                         | WEE1   | 80  | 98  | 97  |
| WEE2                         | WEE2   | 100 | 84  | 98  |
| WNK1                         | WNK1   | 100 | 78  | 74  |
| WNK2                         | WNK2   | NA  | 77  | 59  |
| WNK3                         | WNK3   | 93  | 73  | 73  |
| WNK4                         | WNK4   | NA  | 70  | 71  |

33

|       |         |     |     |     |
|-------|---------|-----|-----|-----|
| YANK1 | STK32A  | 100 | 74  | 87  |
| YANK2 | STK32B  | 98  | 98  | 78  |
| YANK3 | STK32C  | 100 | 100 | 91  |
| YES   | YES1    | 100 | 94  | 100 |
| YSK1  | STK25   | 86  | 51  | 91  |
| YSK4  | MAP3K19 | 41  | 63  | 70  |
| ZAK   | ZAK     | 70  | 99  | 82  |
| ZAP70 | ZAP70   | 79  | 65  | 55  |

34
